# Supplementary material for: Assessment of the training program for Versius, a new innovative robotic system for use in minimal access surgery
Source: PubMed Central journal article supplement — BMJ Surg Interv Health Technol. 2021 Oct 18;3(1):e000057. doi: 10.1136/bmjsit-2020-000057 (PMC8647592; doi:10.1136/bmjsit-2020-000057), 2021-10-18
Supplement: bmjsit-2020-000057supp001.pdf [file bmjsit-2020-000057supp001.pdf]

## **Assessment of the Training Program for Versius, a New Innovative Robot-Assisted Surgical Device for use in Minimal Access Surgery**

Jessica Butterworth, Margaux Sadry, Danielle Julian, Fiona Haig

### **SUPPLEMENTARY MATERIALS**

## SUPPLEMENTARY FIGURES

## Supplementary Figure S1: Overview of the Versius Surgical System

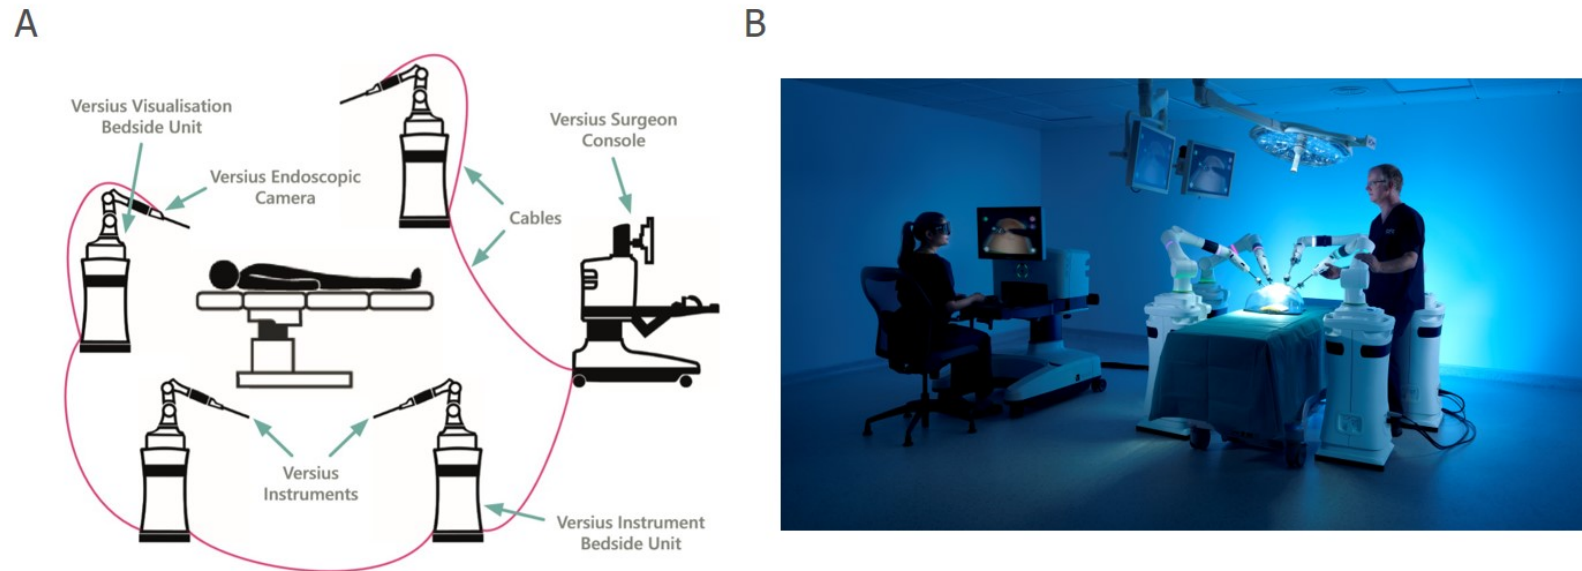

Adapted from Haig et al.<sup>1</sup> A: Schematic overview of the Versius Surgical System; B: Image of the Versius Surgical System.

## Supplementary Figure S2: Remaining Versius Trainer outcomes

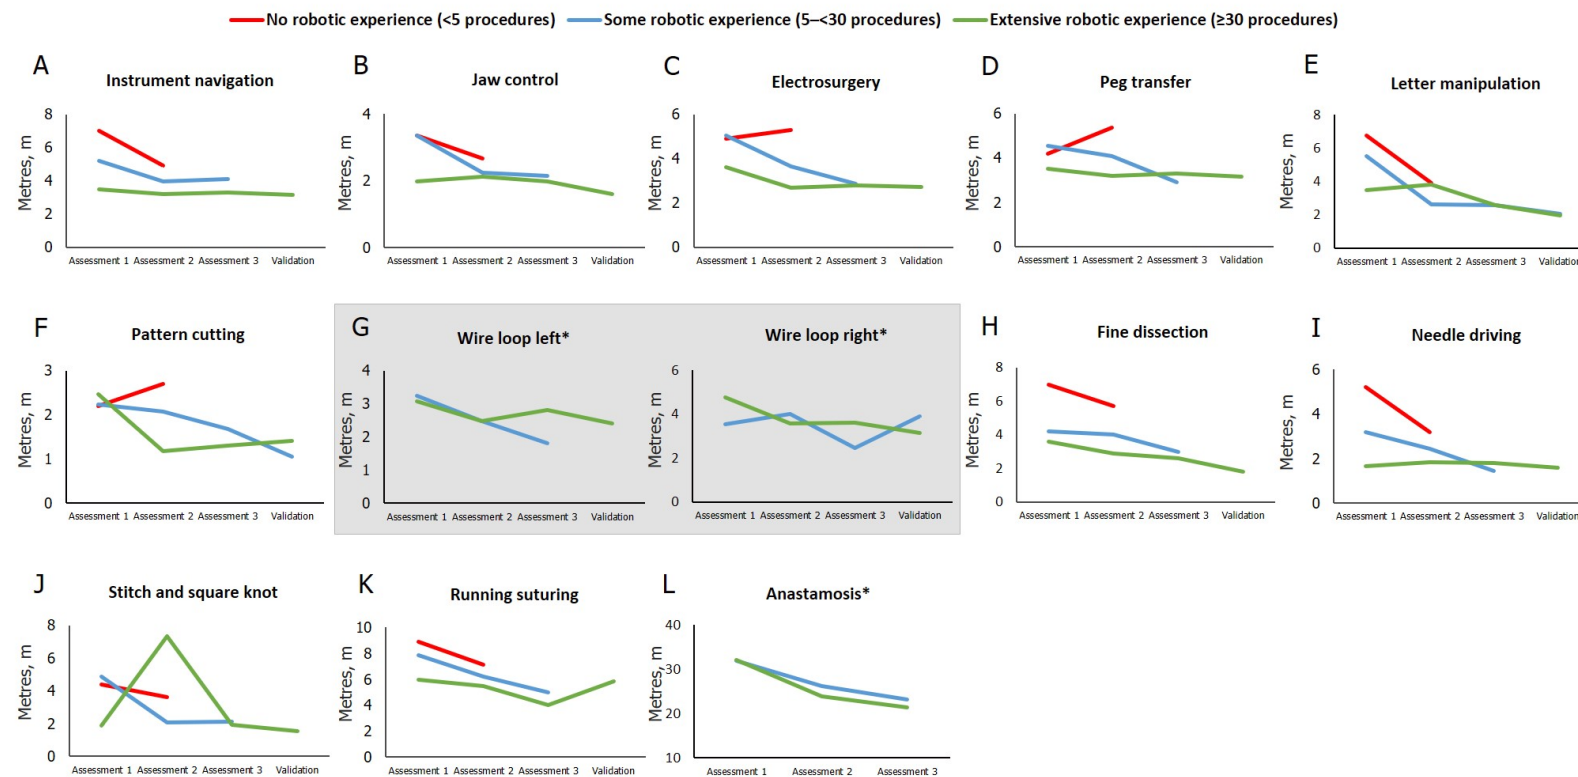

A–L: Combined path lengths for Versius Trainer outcomes. \* Tasks G (wire loop left and wire loop right) and L (anastomosis) were completed by surgeons with some or extensive previous robotic experience only due to time constraints. Decrease in path length indicates an improvement in skill for Versius Trainer outcomes.

## SUPPLEMENTARY METHODS

**Supplementary Table S1: GEARS assessment tool**

| Depth perception                                                                                                |   |                                                                                                                        |   |                                                                                                               |   |
|-----------------------------------------------------------------------------------------------------------------|---|------------------------------------------------------------------------------------------------------------------------|---|---------------------------------------------------------------------------------------------------------------|---|
| 1                                                                                                               | 2 | 3                                                                                                                      | 4 | 5                                                                                                             |   |
| Constantly overshoots target, wide swings, slow to correct                                                      |   | Some overshooting or missing of target, but quick to correct                                                           |   | Accurately directs instruments in correct plane to target                                                     |   |
| Bimanual dexterity                                                                                              |   |                                                                                                                        |   |                                                                                                               |   |
| 1                                                                                                               | 2 | 3                                                                                                                      | 4 | 5                                                                                                             |   |
| Uses only one hand, ignores non-dominant hand, poor coordination                                                |   | Uses both hands, but does not optimize interactions between hands                                                      |   | Expertly uses both hands in a complementary way to provide best exposure                                      |   |
| Efficiency                                                                                                      |   |                                                                                                                        |   |                                                                                                               |   |
| 1                                                                                                               | 2 | 3                                                                                                                      | 4 | 5                                                                                                             |   |
| Inefficient efforts; many uncertain movements; constantly changing focus or persisting without progress         |   | Slow, but planned movements are reasonably organized                                                                   |   | Confident, efficient and safe conduct, maintains focus on task, fluid progression                             |   |
| Force sensitivity                                                                                               |   |                                                                                                                        |   |                                                                                                               |   |
| 1                                                                                                               | 2 | 3                                                                                                                      | 4 | 5                                                                                                             |   |
| Rough moves, tears tissue, injures nearby structures, poor control, frequent suture breakage                    |   | Handles tissue reasonably well, minor trauma to adjacent tissue, rare suture breakage                                  |   | Applies appropriate tension, negligible injury to adjacent structures, no suture breakage                     |   |
| Autonomy                                                                                                        |   |                                                                                                                        |   |                                                                                                               |   |
| 1                                                                                                               | 2 | 3                                                                                                                      | 4 | 5                                                                                                             |   |
| Unable to complete entire task, even with verbal guidance                                                       |   | Able to complete task safely with moderate guidance                                                                    |   | Able to complete task without prompting                                                                       |   |
| Robotic control                                                                                                 |   |                                                                                                                        |   |                                                                                                               |   |
| 1                                                                                                               | 2 | 3                                                                                                                      | 4 | 5                                                                                                             |   |
| Consistently does not optimize view, hand position, or repeated collisions even with guidance                   |   | View is sometimes not optimal. Occasionally needs to relocate arms. Occasional collisions and obstruction of assistant |   | Controls camera and hand position optimally and independently. Minimal collisions or obstruction of assistant |   |
| Use of third arm                                                                                                |   |                                                                                                                        |   |                                                                                                               |   |
| N/A                                                                                                             | 1 | 2                                                                                                                      | 3 | 4                                                                                                             | 5 |
| Consistently does not use 3 <sup>rd</sup> arm, or does not use it well when required, even with verbal guidance |   | Mostly uses 3 <sup>rd</sup> arm in a safe and efficient manner with moderate guidance                                  |   | Consistently uses 3 <sup>rd</sup> arm in a safe and efficient manner without prompting                        |   |

GEARS: Global Evaluative Assessment of Robotic Skills.

**Supplementary Table S2:** GEARS scores based on surgeon experience

| Source                        | Outcome        | Novice                     | Intermediate               | Expert                     |
|-------------------------------|----------------|----------------------------|----------------------------|----------------------------|
| <b>Aghazadeg et al (2015)</b> | Median (range) | 19.0 (11.0–27.0)           | 20.8 (16.5–27.0)           | 30 (29.0–30.0)             |
| <b>Sanchez et al (2016)</b>   | Average (NR)   | 16.0 (±3.0)<br>15.8 (±2.9) | 24.0 (±2.8)<br>23.6 (±3.3) | 29.8 (±0.4)<br>29.8 (±0.4) |
| <b>Goh et al (2012)</b>       | Mean (SD)      | 20.3 (±2.4)                | 22.9 (±2.8)                | 28.7 (±1.8)                |
| <b>Mean Scores</b>            |                | <b>17.8</b>                | <b>22.8</b>                | <b>29.6</b>                |

NR: not reported; SD: standard deviation.

**Aghazadeg et al (2015):**<sup>2</sup> Novice: < 5 procedures; Intermediate: ≥5 but ≤30 procedures; Experts: > 30 robotic procedures completed as primary surgeon.

**Sanchez et al (2016):**<sup>3</sup> Novice: Laparoscopic surgeon, no robotic procedures no training; Intermediate: Undergone formal Da Vinci training but no in vivo procedures;

Expert: > 15 procedures of robotic surgery.

**Goh et al (2012):**<sup>4</sup> Novice: Laparoscopic surgeon, no robotic procedures but in training; Intermediate: Undergone formal Da Vinci training but no in vivo procedures; Expert: Routinely performing robotic surgery (> 30 procedures).

**Supplementary Table S3:** Versius Trainer tasks

| No. | Task                    | Aim                                                                                                                                                                                                                       |
|-----|-------------------------|---------------------------------------------------------------------------------------------------------------------------------------------------------------------------------------------------------------------------|
| 1   | Instrument navigation   | To familiarize the surgeon with the head-up display and how to assign instruments<br>To familiarize the surgeon with using the clutch button to improve his or her dexterity and ergonomics when using the Versius system |
| 2   | Jaw control             | To introduce the concept of controlling the instrument jaws                                                                                                                                                               |
| 3   | Endoscope control       | To introduce control of the endoscope using the thumbsticks                                                                                                                                                               |
| 4   | Multitarget             | To combine working with the head-up display, clutch and endoscope control                                                                                                                                                 |
| 5   | Four arms               | To control multiple arms in the same session                                                                                                                                                                              |
| 6   | Electrosurgery          | To introduce electrosurgery activation                                                                                                                                                                                    |
| 7   | Peg transfer            | To familiarize the surgeon with the functionality of the wristed instruments                                                                                                                                              |
| 8   | Letter manipulation     | To introduce the use of a third instrument to help in completing complex tasks                                                                                                                                            |
| 9   | Pattern cutting         | To introduce the scissors and to develop wrist articulation                                                                                                                                                               |
| 10  | Wire loop               | To improve the surgeon's use of wristed instruments to deliver intricate control                                                                                                                                          |
| 11  | Fine dissection         | To familiarize the surgeon with the electrosurgery instruments                                                                                                                                                            |
| 12  | Needle driving          | To introduce needle control with the wristed instruments                                                                                                                                                                  |
| 13  | Stitch and square knots | To introduce knot tying with the instruments                                                                                                                                                                              |
| 14  | Running suturing        | To improve the surgeon's use of wristed instruments when needle driving and knot tying                                                                                                                                    |
| 15  | Anastomosis             | To bring together all the skills learned from previous tasks                                                                                                                                                              |

**Supplementary Table S4:** Prior robotic experience across each surgical specialty

| Surgical Specialty (n) | Prior Robotic Experience |                          |                            |
|------------------------|--------------------------|--------------------------|----------------------------|
|                        | None (< 5 procedures)    | Some (5–< 30 procedures) | Extensive (≥30 procedures) |
| <b>OB/ GYN (4)</b>     | 1                        | 3                        | 0                          |
| <b>General (5)</b>     | 1                        | 2                        | 2                          |
| <b>Colorectal (4)</b>  | 1                        | 3                        | 0                          |
| <b>Urology (4)</b>     | 1                        | 0                        | 3                          |

OB/ GYN: Obstetrics/Gynecology.

1. Haig F, Medeiros ACB, Chitty K, et al. Usability assessment of Versius, a new robot-assisted surgical device for use in minimal access surgery. *BMJ Surgery, Interventions, & Health Technologies* 2020;2:e000028.
2. Aghazadeh MA, Jayaratna IS, Hung AJ, et al. External validation of Global Evaluative Assessment of Robotic Skills (GEARS). *Surg Endosc* 2015;29:3261-6.
3. Sanchez R, Rodriguez O, Rosciano J, et al. Robotic surgery training: construct validity of Global Evaluative Assessment of Robotic Skills (GEARS). *J Robot Surg* 2016;10:227-31.
4. Goh AC, Goldfarb DW, Sander JC, et al. Global evaluative assessment of robotic skills: validation of a clinical assessment tool to measure robotic surgical skills. *J Urol* 2012;187:247-52.
